# Supplementary material for: Comparison of Clinical Outcomes of Robotic Natural Orifice Specimen Extraction Surgery and Transabdominal Wall Specimen Retrieval in Colorectal Surgery: A Systematic Review and Meta-analysis
Source: Research Square preprint supplement (doi:10.21203/rs.3.rs-7313941/v1), 2026-01-16
Supplement: Supplementary file 1 [file 2c1c17fcb8d35dccb8b37283.docx]

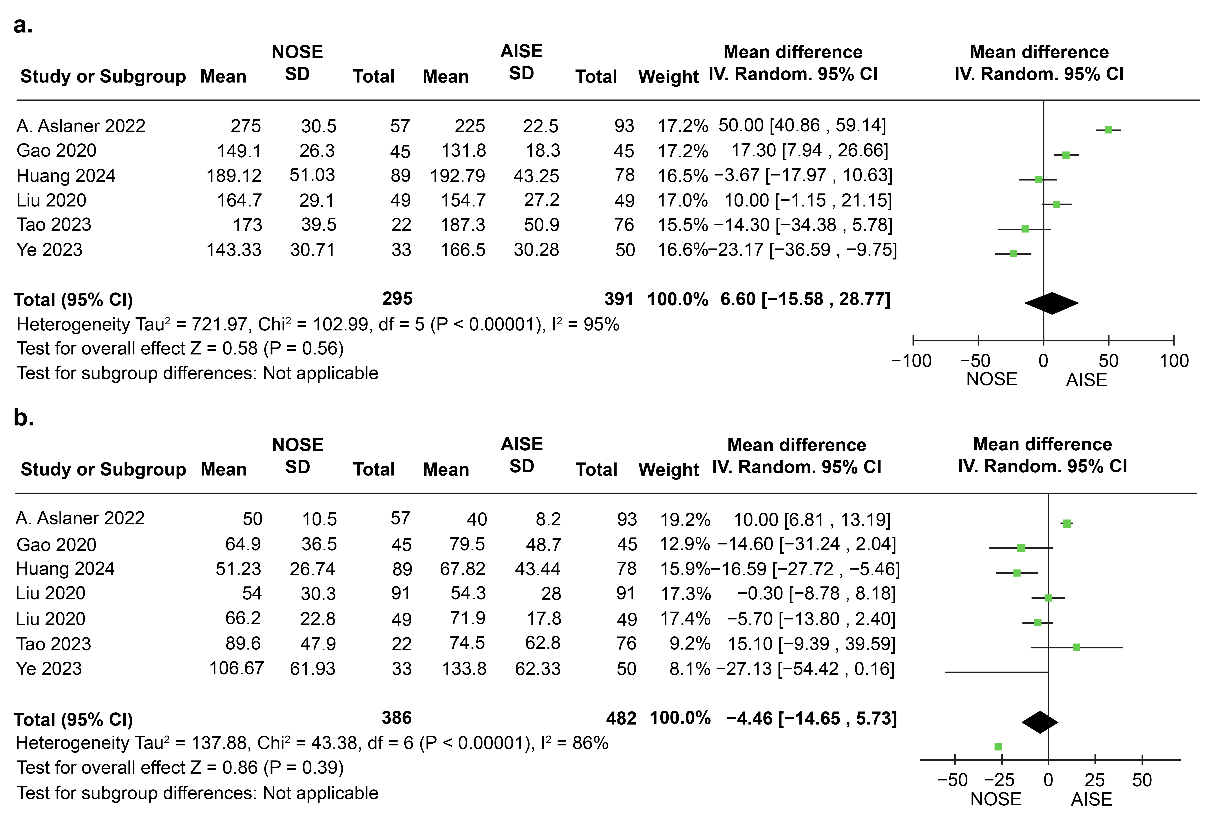


**S1 Fig.** Forest plot comparing intra-operative outcomes in the NOSE and AISE groups. **a**. Duration of surgery; **b**. Blood loss.


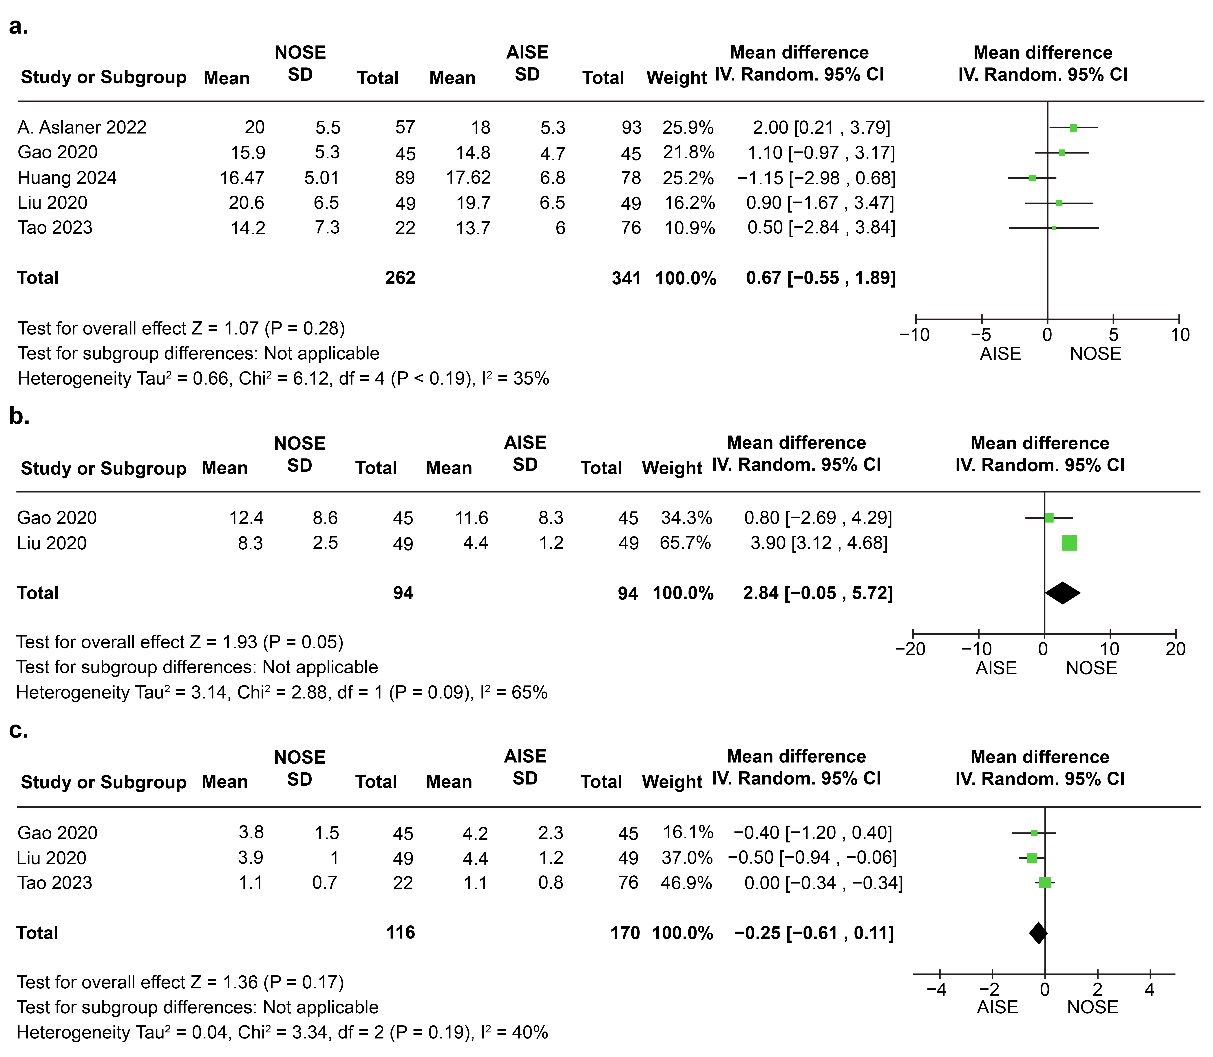


**S2 Fig.** Forest plot comparing pathological outcomes in the NOSE and AISE groups. a. Lymph node harvested; b. Proximal margin; c. Distal margin


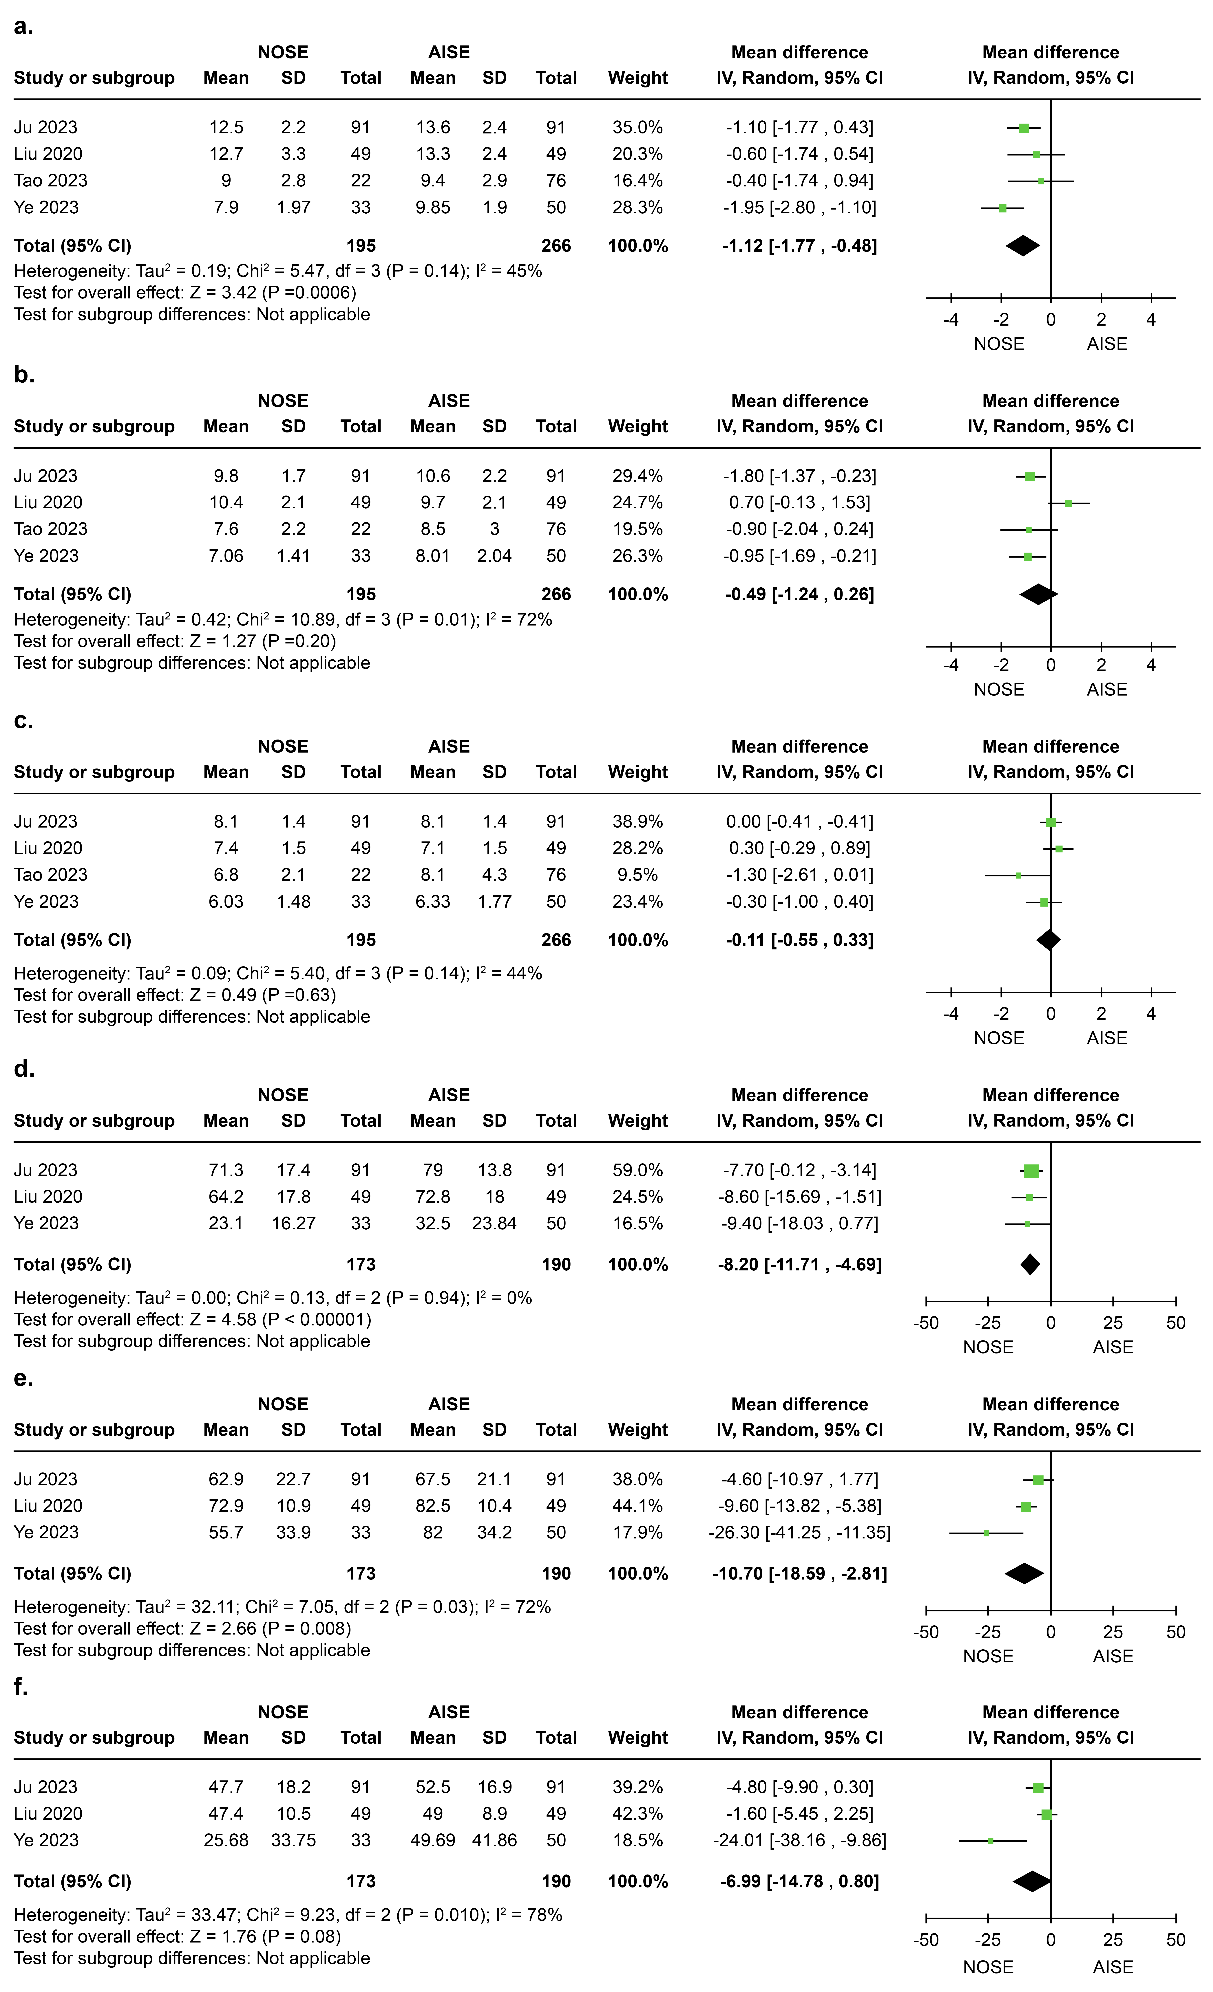


**S3 Fig.** Forest plot comparing postoperative inflammatory response in the NOSE and AISE groups. a. WBC day 1; b. WBC day 3; c. WBC day 5; d. CRP day 1; e. CRP day 3; f. CRP day 5


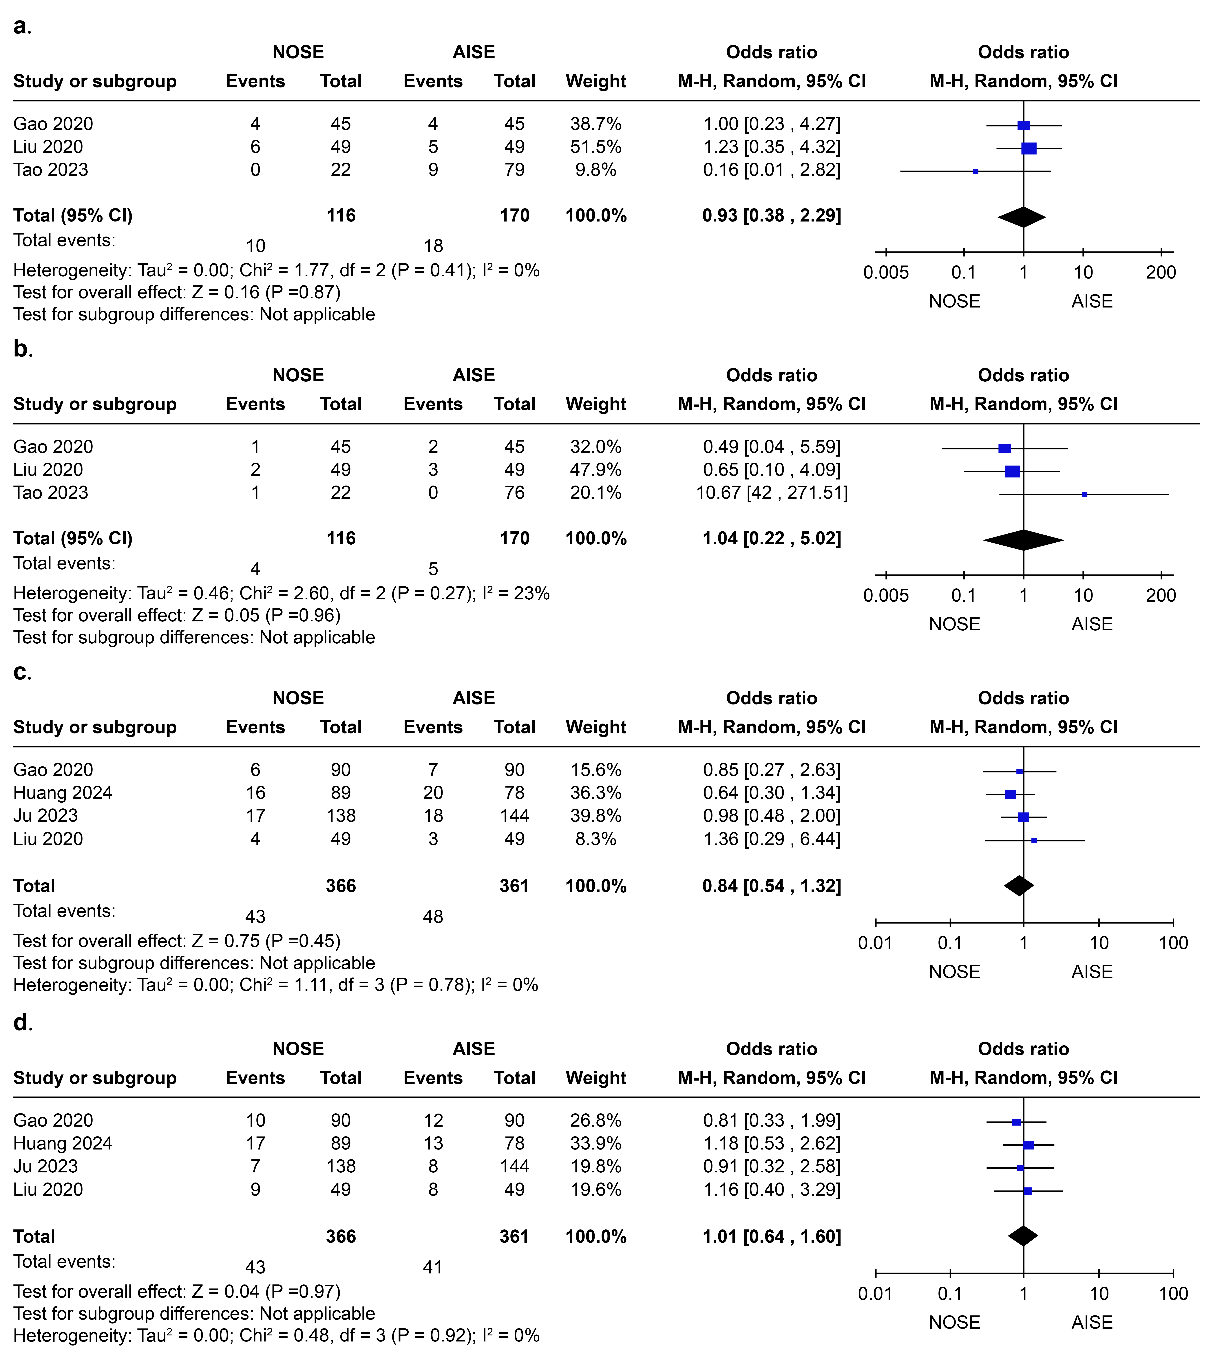


**S4 Fig.** Forest plot comparing long-term outcomes in the NOSE and AISE groups. a. Distant metastasis; b. Local recurrence; c. 3-year overall survival; d. 3-year disease-free survival


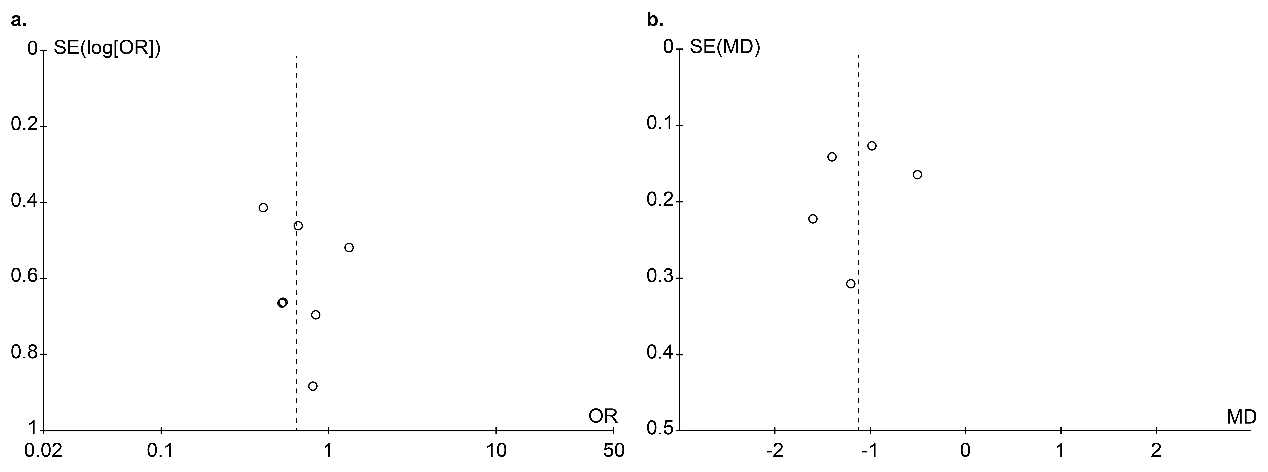


**S5 Fig**. Funnel Plot. a. Overall postoperative complications. b. Postoperative pain
