# Supplementary material for: Comparison of Clinical Outcomes of Robotic Natural Orifice Specimen Extraction Surgery and Transabdominal Wall Specimen Retrieval in Colorectal Surgery: A Systematic Review and Meta-analysis
Source: Research Square preprint supplement (doi:10.21203/rs.3.rs-7313941/v1), 2026-01-16

**S1 Methods.** Detailed information on the search strategy.

The search incorporated free-text keywords and Medical Subject Heading terms without language restrictions, including (colorectal neoplasms/surgery) AND (robotic surgical procedures) AND (specimen extraction). In instances of overlapping research, the most comprehensive study was selected by two independent reviewers, according to predefined criteria. The reference lists of the included trials and related review articles were manually reviewed to identify any other relevant studies.

Two reviewers independently evaluated the relevance of the identified studies by screening titles and abstracts. The most comprehensive study was selected for inclusion if overlapping studies originated from the same research team, and studies were excluded only if both reviewers agreed to their exclusion to ensure high sensitivity in the selection process. Any disagreements between the reviewers were resolved after discussion; if a consensus could not be reached, a third reviewer was involved, and all decisions were documented to ensure transparency. After the initial screening, full-text evaluation was performed on the studies obtained in the preliminary assessment.

Pubmed


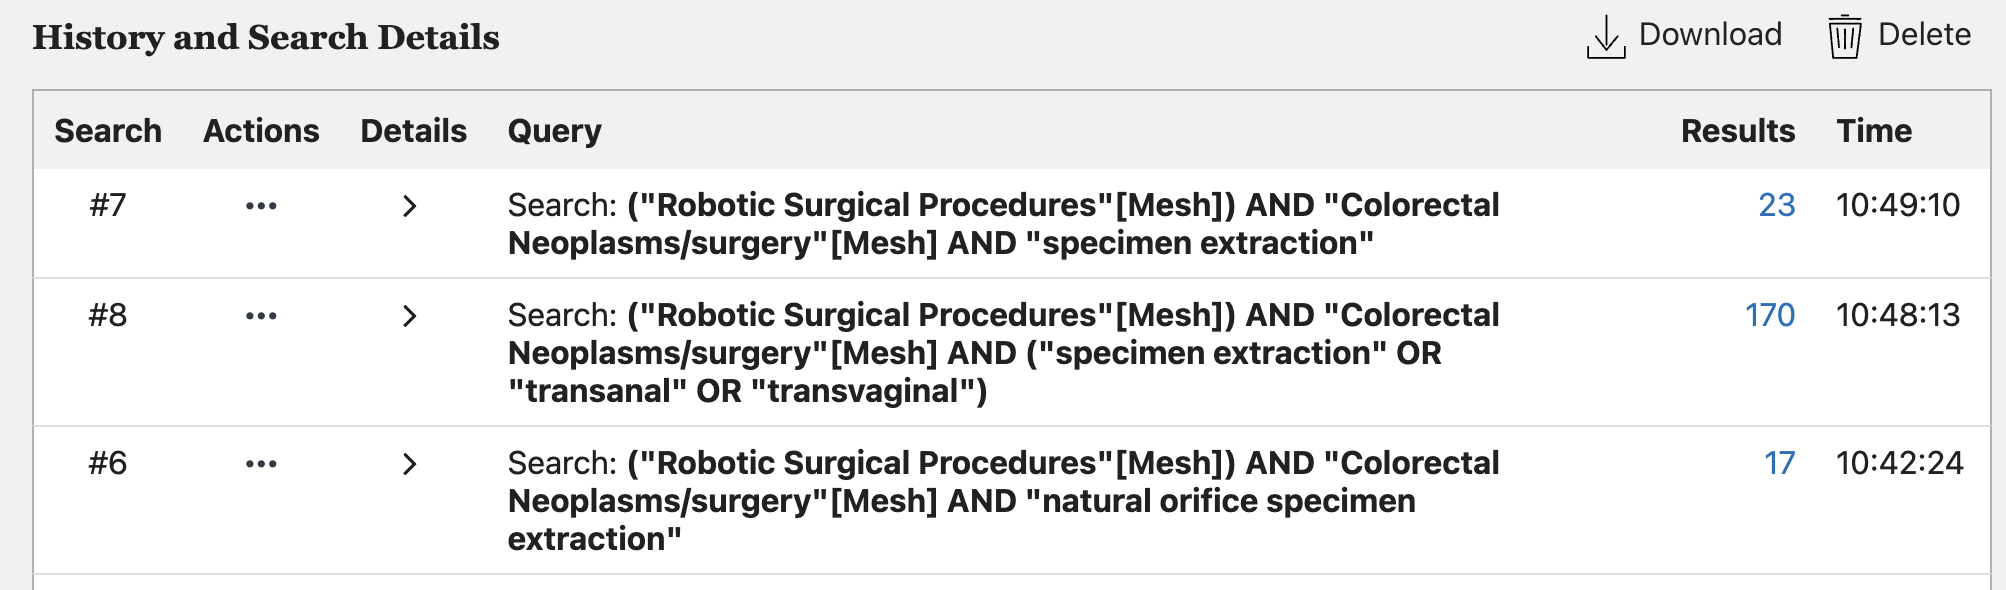

Supplement: Supplementary file 2 [file 6daf900b41fe15cfd472dd04.docx]
