# Supplementary material for: Comparison of Clinical Outcomes of Robotic Natural Orifice Specimen Extraction Surgery and Transabdominal Wall Specimen Retrieval in Colorectal Surgery: A Systematic Review and Meta-analysis
Source: Research Square preprint supplement (doi:10.21203/rs.3.rs-7313941/v1), 2026-01-16
Supplement: Supplementary file 3 [file e5e0a7af51d1948c99b81ca2.docx]

**S1 Table. Scores of the observational studies according to the Newcastle-Ottawa Scale**

|  | Selection | | | | Comparability | Outcome | | | Total |
| --- | --- | --- | --- | --- | --- | --- | --- | --- | --- |
|  | 1 | 2 | 3 | 4 | 5 | 6 | 7 | 8 |  |
| Gao 2020 | 1 | 1 | 1 | 1 | 2 | 1 | 1 | 1 | 9 |
| Liu 2020 | 1 | 1 | 1 | 1 | 2 | 1 | 1 | 1 | 9 |
| A. Aslaner 2022 | 1 | 1 | 1 | 1 | 1 | 1 | 1 | 1 | 8 |
| Ju 2023 | 1 | 1 | 1 | 1 | 2 | 1 | 1 | 1 | 9 |
| Ye 2023 | 1 | 1 | 1 | 1 | 1 | 1 | 1 | 1 | 8 |
| Tao 2023 | 1 | 1 | 1 | 1 | 1 | 1 | 1 | 1 | 8 |
| Huang 2024 | 1 | 1 | 1 | 1 | 2 | 1 | 1 | 1 | 9 |

Notes: 1, representativeness of the exposed cohort; 2, Selection of the non exposed cohort; 3, ascertainment of exposure; 4, outcome was not present at start of study; 5, comparability of Cohorts; 6, assessment of outcome; 7, follow-up long enough; 8, adequacy of follow up
